# Supplementary material for: “Would You Get Vaccinated against COVID-19?” The Picture Emerging from a Study on the Prevalence of SARS-CoV-2 Infection in the General Population of the Veneto Region
Source: MDPI journal article supplement (doi:10.3390/vaccines10030365), 2022-02-25
Supplement: s1 [file s1]

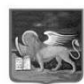

REGIONE DEL VENETO

**QUESTIONARIO RACCOLTA INFORMAZIONI**

Progetto: "Attività di ricerca al fine di migliorare le attività di prevenzione della Regione Veneto"  
(Deliberazione Giunta Regionale del Veneto n. 1643/2020)

ID

8  
A N N I  
1922-2022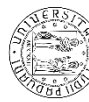UNIVERSITÀ  
DEGLI STUDI  
DI PADOVA**Le informazioni verranno utilizzate esclusivamente in forma aggregata e con finalità di ricerca**

|                                                                                                                                                                                                                                                                                                                                                                                                                                                                                              |                                                                                                                            |                                                                                                                                                                                                                                                                                                     |                                                                                                                                   |                                                                                        |
|----------------------------------------------------------------------------------------------------------------------------------------------------------------------------------------------------------------------------------------------------------------------------------------------------------------------------------------------------------------------------------------------------------------------------------------------------------------------------------------------|----------------------------------------------------------------------------------------------------------------------------|-----------------------------------------------------------------------------------------------------------------------------------------------------------------------------------------------------------------------------------------------------------------------------------------------------|-----------------------------------------------------------------------------------------------------------------------------------|----------------------------------------------------------------------------------------|
| <b>Nome e cognome</b>                                                                                                                                                                                                                                                                                                                                                                                                                                                                        |                                                                                                                            | <b>Sesso:</b> <input type="checkbox"/> maschio <input type="checkbox"/> femmina                                                                                                                                                                                                                     |                                                                                                                                   |                                                                                        |
| <b>Data di nascita</b><br>/ /                                                                                                                                                                                                                                                                                                                                                                                                                                                                | <b>Provincia di residenza/domicilio abituale</b>                                                                           | <input type="checkbox"/> VENEZIA<br><input type="checkbox"/> PADOVA<br><input type="checkbox"/> ROVIGO                                                                                                                                                                                              | <input type="checkbox"/> VERONA<br><input type="checkbox"/> BELLUNO<br><input type="checkbox"/> ALTRA                             | <input type="checkbox"/> VICENZA<br><input type="checkbox"/> TREVISO                   |
| <b>Codice fiscale</b>                                                                                                                                                                                                                                                                                                                                                                                                                                                                        | <b>Email</b>                                                                                                               | <b>telefono</b>                                                                                                                                                                                                                                                                                     |                                                                                                                                   |                                                                                        |
| Partecipo in qualità di: <input type="checkbox"/> dipendente comune <input type="checkbox"/> CRI <input type="checkbox"/> GdF <input type="checkbox"/> collaboratore grande distribuzione<br><input type="checkbox"/> altro (indicare) _____<br>Oppure <input type="checkbox"/> figlio <input type="checkbox"/> genitore <input type="checkbox"/> compagno/a <input type="checkbox"/> altro (indicare _____)<br>Indicare il nome e cognome della persona di riferimento invitata al progetto |                                                                                                                            |                                                                                                                                                                                                                                                                                                     |                                                                                                                                   |                                                                                        |
| <b>Indica le Regione dove hai soggiornato nell'ultima settimana</b> <input type="checkbox"/> VENETO<br><input type="checkbox"/> Altra regione (indicare) _____                                                                                                                                                                                                                                                                                                                               |                                                                                                                            | <b>Quante sono le persone che vivono con te</b><br><input type="checkbox"/> 0 <input type="checkbox"/> 1 <input type="checkbox"/> 2 <input type="checkbox"/> 3 <input type="checkbox"/> 4 <input type="checkbox"/> 5 <input type="checkbox"/> >5                                                    |                                                                                                                                   |                                                                                        |
| <b>Istruzione</b>                                                                                                                                                                                                                                                                                                                                                                                                                                                                            | <input type="checkbox"/> primaria (elementari)<br><input type="checkbox"/> secondaria primo grado (medie)                  |                                                                                                                                                                                                                                                                                                     | <input type="checkbox"/> secondaria secondo grado (superiori)<br><input type="checkbox"/> superiore (università)                  |                                                                                        |
| <b>Occupazione</b>                                                                                                                                                                                                                                                                                                                                                                                                                                                                           | <input type="checkbox"/> studente<br><input type="checkbox"/> libero professionista<br><input type="checkbox"/> pensionato |                                                                                                                                                                                                                                                                                                     | <input type="checkbox"/> disoccupato<br><input type="checkbox"/> dipendente<br><input type="checkbox"/> altro (specificare) _____ | <input type="checkbox"/> casalinga<br><input type="checkbox"/> docente                 |
| <b>Nell'ambito della tua occupazione, quante persone (al di fuori del tuo nucleo familiare) incontri mediamente in una giornata?</b>                                                                                                                                                                                                                                                                                                                                                         |                                                                                                                            | <input type="checkbox"/> nessuna<br><input type="checkbox"/> una<br><input type="checkbox"/> tra 2 e 5<br><input type="checkbox"/> tra 6 e 10<br><input type="checkbox"/> più di 10                                                                                                                 |                                                                                                                                   |                                                                                        |
| <b>Prendi farmaci o ti è stata diagnosticata una patologia cronica</b><br><input type="checkbox"/> no <input type="checkbox"/> sì indica quale                                                                                                                                                                                                                                                                                                                                               |                                                                                                                            |                                                                                                                                                                                                                                                                                                     |                                                                                                                                   |                                                                                        |
|                                                                                                                                                                                                                                                                                                                                                                                                                                                                                              |                                                                                                                            | <input type="checkbox"/> malattie del cuore<br><input type="checkbox"/> malattie respiratorie<br><input type="checkbox"/> allergie                                                                                                                                                                  | <input type="checkbox"/> diabete<br><input type="checkbox"/> tumore<br><input type="checkbox"/> malattie renali                   | <input type="checkbox"/> pressione alta<br><input type="checkbox"/> deficit immunitari |
| <b>Hai avuto uno dei seguenti sintomi</b>                                                                                                                                                                                                                                                                                                                                                                                                                                                    | <b>oggi</b>                                                                                                                | <b>Settimana scorsa</b>                                                                                                                                                                                                                                                                             | <b>8-14 giorni fa</b>                                                                                                             |                                                                                        |
| Nessuno                                                                                                                                                                                                                                                                                                                                                                                                                                                                                      | <input type="checkbox"/>                                                                                                   | <input type="checkbox"/>                                                                                                                                                                                                                                                                            | <input type="checkbox"/>                                                                                                          |                                                                                        |
| Febbre (> 37°)                                                                                                                                                                                                                                                                                                                                                                                                                                                                               | <input type="checkbox"/>                                                                                                   | <input type="checkbox"/>                                                                                                                                                                                                                                                                            | <input type="checkbox"/>                                                                                                          |                                                                                        |
| Mal di gola                                                                                                                                                                                                                                                                                                                                                                                                                                                                                  | <input type="checkbox"/>                                                                                                   | <input type="checkbox"/>                                                                                                                                                                                                                                                                            | <input type="checkbox"/>                                                                                                          |                                                                                        |
| Dolore muscolare                                                                                                                                                                                                                                                                                                                                                                                                                                                                             | <input type="checkbox"/>                                                                                                   | <input type="checkbox"/>                                                                                                                                                                                                                                                                            | <input type="checkbox"/>                                                                                                          |                                                                                        |
| Mal di testa                                                                                                                                                                                                                                                                                                                                                                                                                                                                                 | <input type="checkbox"/>                                                                                                   | <input type="checkbox"/>                                                                                                                                                                                                                                                                            | <input type="checkbox"/>                                                                                                          |                                                                                        |
| Non sento bene gli odori                                                                                                                                                                                                                                                                                                                                                                                                                                                                     | <input type="checkbox"/>                                                                                                   | <input type="checkbox"/>                                                                                                                                                                                                                                                                            | <input type="checkbox"/>                                                                                                          |                                                                                        |
| Non sento bene i sapori                                                                                                                                                                                                                                                                                                                                                                                                                                                                      | <input type="checkbox"/>                                                                                                   | <input type="checkbox"/>                                                                                                                                                                                                                                                                            | <input type="checkbox"/>                                                                                                          |                                                                                        |
| <b>Ha mai eseguito un tampone?</b> <input type="checkbox"/> Mai <input type="checkbox"/> Negli ultimi 14 giorni <input type="checkbox"/> più di 14 giorni fa                                                                                                                                                                                                                                                                                                                                 |                                                                                                                            |                                                                                                                                                                                                                                                                                                     |                                                                                                                                   |                                                                                        |
| <b>Motivazione ultimo tampone</b> <input type="checkbox"/> sintomi <input type="checkbox"/> contatto con sospetto e/o positivo <input type="checkbox"/> screening                                                                                                                                                                                                                                                                                                                            |                                                                                                                            |                                                                                                                                                                                                                                                                                                     |                                                                                                                                   |                                                                                        |
| <b>Sei mai stato in isolamento fiduciario/quarantena</b><br>(se non ricordi le date inserire il mese)                                                                                                                                                                                                                                                                                                                                                                                        |                                                                                                                            | <input type="checkbox"/> no                                                                                                                                                                                                                                                                         | <input type="checkbox"/> sì                                                                                                       | dal _____ al _____                                                                     |
| <b>Sei mai stato positivo al Covid</b><br>(se non ricordi le date inserire il mese)                                                                                                                                                                                                                                                                                                                                                                                                          |                                                                                                                            | <input type="checkbox"/> no                                                                                                                                                                                                                                                                         | <input type="checkbox"/> sì                                                                                                       | dal _____ al _____                                                                     |
| <b>Al giorno, con quale frequenza esci di casa?</b>                                                                                                                                                                                                                                                                                                                                                                                                                                          |                                                                                                                            | <input type="checkbox"/> non esco più<br><input type="checkbox"/> meno di una volta a settimana<br><input type="checkbox"/> una volta a settimana<br><input type="checkbox"/> 2-6 volte a settimana<br><input type="checkbox"/> una volta al giorno<br><input type="checkbox"/> più volte al giorno |                                                                                                                                   |                                                                                        |
| <b>Ti vaccineresti contro il Covid?</b>                                                                                                                                                                                                                                                                                                                                                                                                                                                      |                                                                                                                            | <input type="checkbox"/> no                                                                                                                                                                                                                                                                         | <input type="checkbox"/> sì                                                                                                       | <input type="checkbox"/> non so                                                        |
| <b>Ti sei vaccinato contro l'influenza quest'anno?</b>                                                                                                                                                                                                                                                                                                                                                                                                                                       |                                                                                                                            | <input type="checkbox"/> no                                                                                                                                                                                                                                                                         | <input type="checkbox"/> sì                                                                                                       |                                                                                        |
| <b>Esito tampone</b><br>(a cura del laboratorio)                                                                                                                                                                                                                                                                                                                                                                                                                                             | ID Pool                                                                                                                    | <input type="checkbox"/> positivo                                                                                                                                                                                                                                                                   | <input type="checkbox"/> negativo                                                                                                 |                                                                                        |
